# Supplementary material for: Simultaneous Production of Biohydrogen (bioH2) and Poly-Hydroxy-Alkanoates (PHAs) by a Photoheterotrophic Consortium Bioaugmented with Syntrophomonas wolfei
Source: MDPI journal article supplement (doi:10.3390/fermentation8110644), 2022-11-15
Supplement: s1 [file s1]

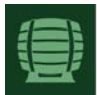

## Supplementary material S1.

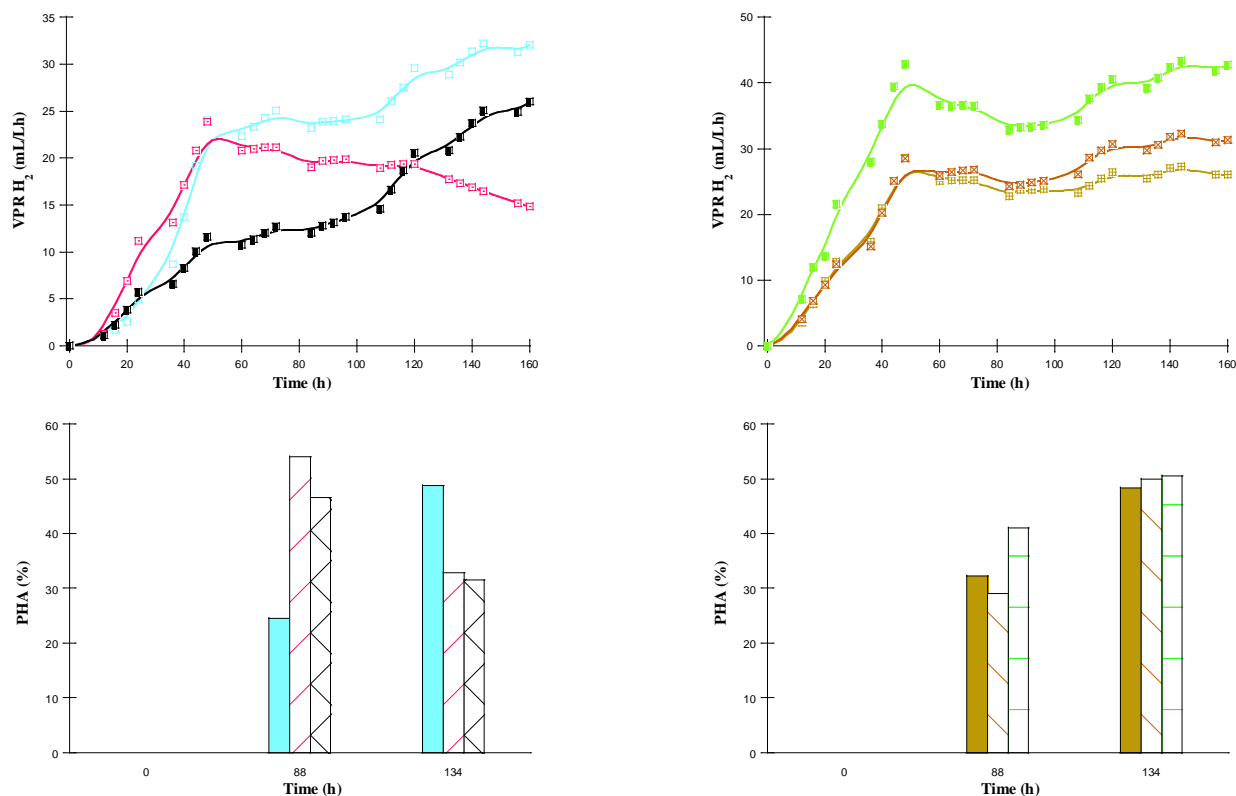

**Figure S1.** Comparison between bioH<sub>2</sub> volumetric production rates (H<sub>2</sub>VPR) and PHA production obtained by pure cultures: A) H<sub>2</sub>VPR of *C. pasteurianum* (□), H<sub>2</sub>VPR of *R. palustris* (□) and H<sub>2</sub>VPR of *S. wolfei* (□); C) PHA *C. pasteurianum* (blue solid column), *R. palustris* (pink column), *S. wolfei* (crossed black column); and by the microbial consortia: B) H<sub>2</sub>VPR of "NPC-C4" (⊞), H<sub>2</sub>VPR of "BNPC-C4" (⊞) and H<sub>2</sub>VPR of the "design consortium" (□); D) PHA "NPC-C4" (solid golden column), "BNPC-C4" (brown column), "design consortium" (crossed green column).
